# Supplementary material for: Water-recyclable and reusable fluorescent sensors for nerve gas mimetic detection
Source: Royal Society of Chemistry journal article supplement (doi:10.1039/d4an00789a), 2024-01-01
Supplement: d4an00789a1.pdf [file d4an00789a1.pdf]

## Supplementary File

### Water recyclable and reusable fluorescent sensor for nerve gas mimic detection

Ashima Thakur<sup>#</sup>, Preeti AshokKumar Chaudhran<sup>#</sup>, and Abha Sharma<sup>\*</sup>

Department of Medicinal Chemistry, National Institute of Pharmaceutical Education and Research Raebareli, Transit campus Lucknow, Uttar Pradesh, India

<sup>\*</sup>Email: [abha.sharma@niperraebareli.edu.in](mailto:abha.sharma@niperraebareli.edu.in)

#### Table of Contents

|                                                                                                                                                                                                                                                                                                                                                                                                                                                                                                                                                                                           |   |
|-------------------------------------------------------------------------------------------------------------------------------------------------------------------------------------------------------------------------------------------------------------------------------------------------------------------------------------------------------------------------------------------------------------------------------------------------------------------------------------------------------------------------------------------------------------------------------------------|---|
| <b>Figure S1</b> <sup>1</sup> H NMR spectrum of <b>IMPC</b> at 500 MHz in CDCl <sub>3</sub> .....                                                                                                                                                                                                                                                                                                                                                                                                                                                                                         | 3 |
| <b>Figure S2</b> <sup>13</sup> C NMR spectrum of <b>IMPC</b> at 125 MHz in CDCl <sub>3</sub> .....                                                                                                                                                                                                                                                                                                                                                                                                                                                                                        | 4 |
| <b>Figure S3</b> HRMS Data of <b>IMPC</b> .....                                                                                                                                                                                                                                                                                                                                                                                                                                                                                                                                           | 4 |
| <b>Figure S4</b> <sup>1</sup> H NMR spectrum of <b>IMPC-OH</b> at 500 MHz in DMSO- <i>d</i> <sub>6</sub> .....                                                                                                                                                                                                                                                                                                                                                                                                                                                                            | 4 |
| <b>Figure S5</b> <sup>13</sup> C NMR spectrum of <b>IMPC-OH</b> at 125 MHz in DMSO- <i>d</i> <sub>6</sub> .....                                                                                                                                                                                                                                                                                                                                                                                                                                                                           | 5 |
| <b>Figure S6</b> HRMS Data of <b>IMPC-OH</b> .....                                                                                                                                                                                                                                                                                                                                                                                                                                                                                                                                        | 5 |
| <b>Table S1</b> Solvent-dependent photophysical properties of <b>IMPC</b> and <b>IMPC-OH</b> .....                                                                                                                                                                                                                                                                                                                                                                                                                                                                                        | 6 |
| <b>Figure S7</b> (A) UV-Vis. absorption of <b>IMPC</b> (20 μM) (B) UV-Vis. absorption of <b>IMPC-OH</b> (20 μM) ..                                                                                                                                                                                                                                                                                                                                                                                                                                                                        | 7 |
| <b>Figure S8</b> Photostability of (A) <b>IMPC</b> and (B) <b>IMPC-OH</b> .....                                                                                                                                                                                                                                                                                                                                                                                                                                                                                                           | 7 |
| <b>Figure S9</b> (A) UV-vis. Spectrum of <b>IMPC</b> (10 μM) (λ <sub>ex</sub> = 348 nm, exc. slit width = 5, em. slit width = 5 and 560 V) and (B) UV-Vis. of <b>IMPC-OH</b> (20 μM) (λ <sub>ex</sub> = 348 nm, exc. slit width = 10, em. slit width = 10 and 500 V) against various types of OPs compounds (10 μM) in CHCl <sub>3</sub> and their visual changes under hand-held UV lamp at wavelength 254 nm for <b>IMPC</b> , MAI, DMMP, PHO, FN, DCNP, CP, LIN, AZA left hand side images and <b>IMPC-OH</b> followed by same sequence of OP compounds (right hand side images) ..... | 7 |
| <b>Figure S10</b> (A) UV spectra of <b>IMPC</b> (10 μM) (B) <b>IMPC-OH</b> (20 μM) with different interfering analytes (λ <sub>ex</sub> = 348 nm, exc. slit width = 10, em. slit width = 10 and 500 V) and their photographs under a UV lamp at 254 nm. ....                                                                                                                                                                                                                                                                                                                              | 8 |
| <b>Figure S11</b> (A) UV-Vis. of <b>IMPC</b> (10 μM) (B) <b>IMPC-OH</b> with increasing concentration of DCNP<br>Inset: Visible color image of <b>IMPC-OH</b> in absence and presence of DCNP under UV lamp at 254 nm. ....                                                                                                                                                                                                                                                                                                                                                               | 8 |
| <b>Figure S12</b> Partial <sup>1</sup> H NMR of (A) <b>IMPC</b> (B) <b>IMPC</b> with DCNP just after addition (C) <b>IMPC</b> .....                                                                                                                                                                                                                                                                                                                                                                                                                                                       | 9 |
| with DCNP after 1hr at 500 MHz in CDCl <sub>3</sub> .....                                                                                                                                                                                                                                                                                                                                                                                                                                                                                                                                 | 9 |
| .....                                                                                                                                                                                                                                                                                                                                                                                                                                                                                                                                                                                     | 9 |
| <b>Figure S13</b> <sup>13</sup> C NMR of (A) <b>IMPC</b> (B) <b>IMPC</b> with DCNP just after addition (C) <b>IMPC</b> .....                                                                                                                                                                                                                                                                                                                                                                                                                                                              | 9 |

|                                                                                                                                                                                                                                                                                                                                                                                       |    |
|---------------------------------------------------------------------------------------------------------------------------------------------------------------------------------------------------------------------------------------------------------------------------------------------------------------------------------------------------------------------------------------|----|
| with DCNP after 1hr. ....                                                                                                                                                                                                                                                                                                                                                             | 9  |
| <b>Figure S14</b> Partial <sup>1</sup> H NMR of (A) <b>IMPC-OH</b> (B) <b>IMPC-OH</b> with DCNP just after addition (C) <b>IMPC-OH</b> with DCNP after 1hr at 500 MHz in CDCl <sub>3</sub> . ....                                                                                                                                                                                     | 10 |
| <b>Figure S15</b> Partial <sup>13</sup> C NMR of (A) <b>IMPC-OH</b> (B) <b>IMPC-OH</b> + DCNP (just after addition) (C) After 1 hr. at 125 MHz in CDCl <sub>3</sub> . ....                                                                                                                                                                                                            | 10 |
| <b>Figure S16</b> IR spectrum of (A) <b>IMPC</b> alone and (B) <b>IMPC</b> with DCNP.....                                                                                                                                                                                                                                                                                             | 11 |
| <b>Figure S17</b> IR spectrum of (A) <b>IMPC-OH</b> alone and (B) <b>IMPC-OH</b> with DCNP (C) DCNP only. ...                                                                                                                                                                                                                                                                         | 11 |
| <b>Figure S18</b> (A) TLC analysis of <b>IMPC</b> (left) and <b>IMPC-OH</b> (right) where probe only, probe with DCNP followed by Co are spotted from left to right. (B) Fluorecence spectrum of <b>IMPC</b> in solvent EtOH and ACN, after addition of DCNP and upon dilution with water, (C) Visualization of the EtOH systems, (D) Visualization of the ACN systems at 365 nm..... | 12 |
| <b>Figure S19</b> HPLC data of (A) <b>IMPC</b> and <b>IMPC</b> with DCNP, (B) <b>IMPC-OH</b> and <b>IMPC-OH</b> with DCNP HPLC Analysis.....                                                                                                                                                                                                                                          | 12 |

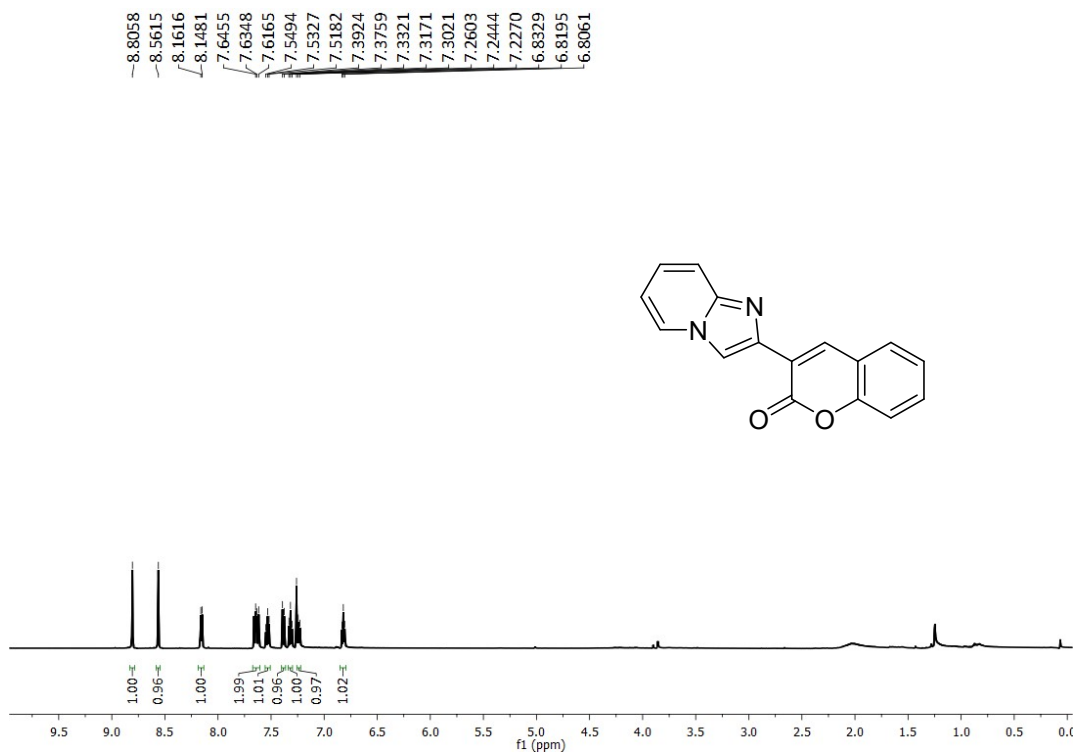

Figure S1. <sup>1</sup>H NMR spectrum of IMPC at 500 MHz in CDCl<sub>3</sub>

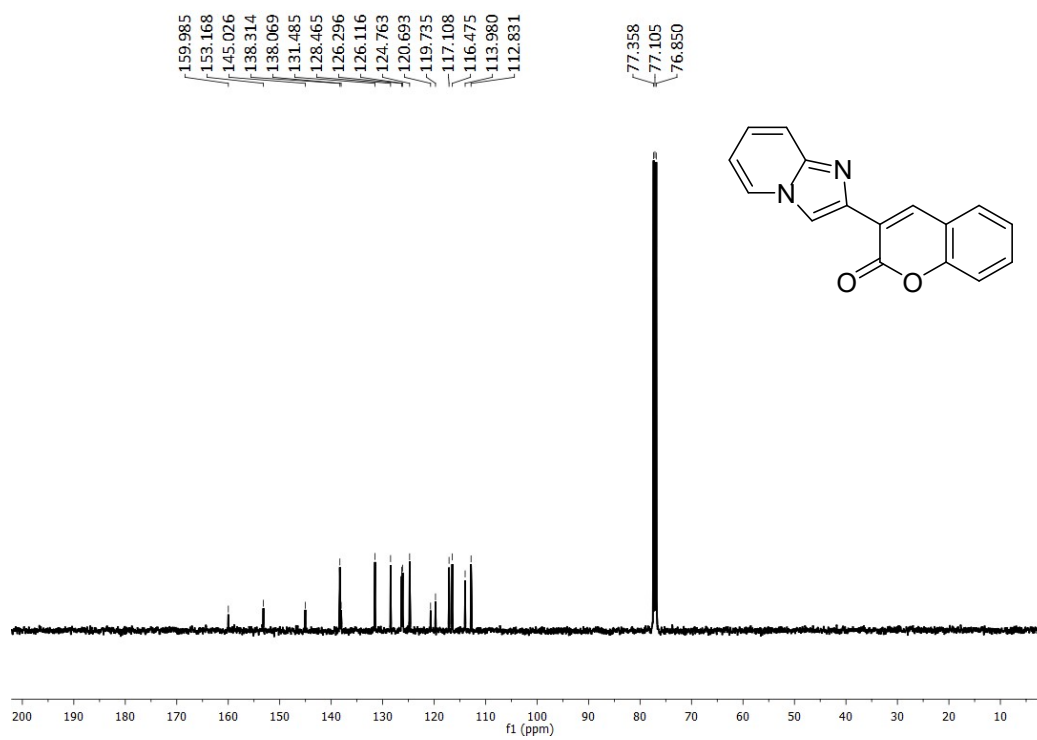

**Figure S2.**  $^{13}\text{C}$  NMR spectrum of **IMPC** at 125 MHz in  $\text{CDCl}_3$

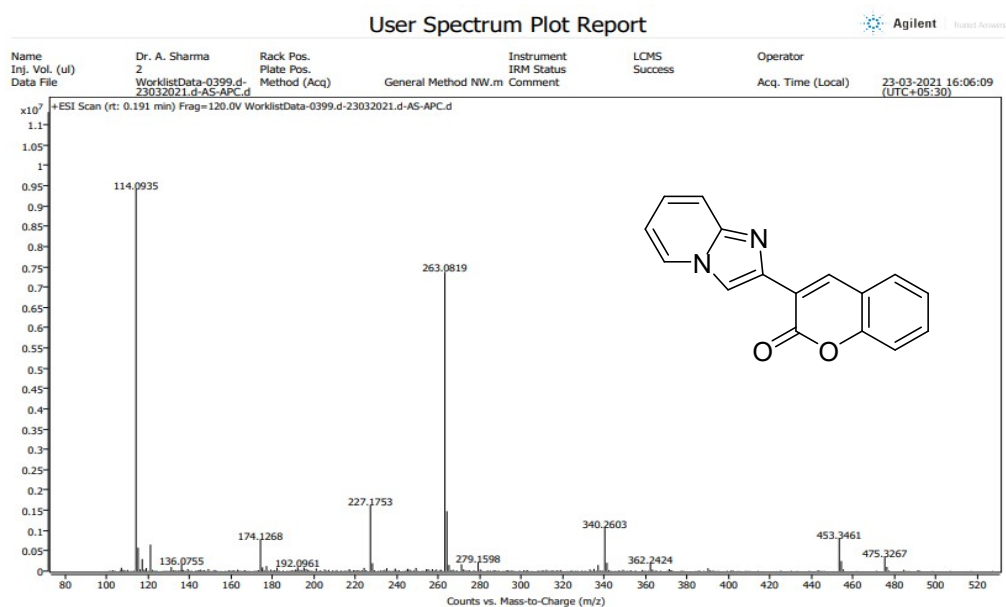

**Figure S3.** HRMS Data of **IMPC**

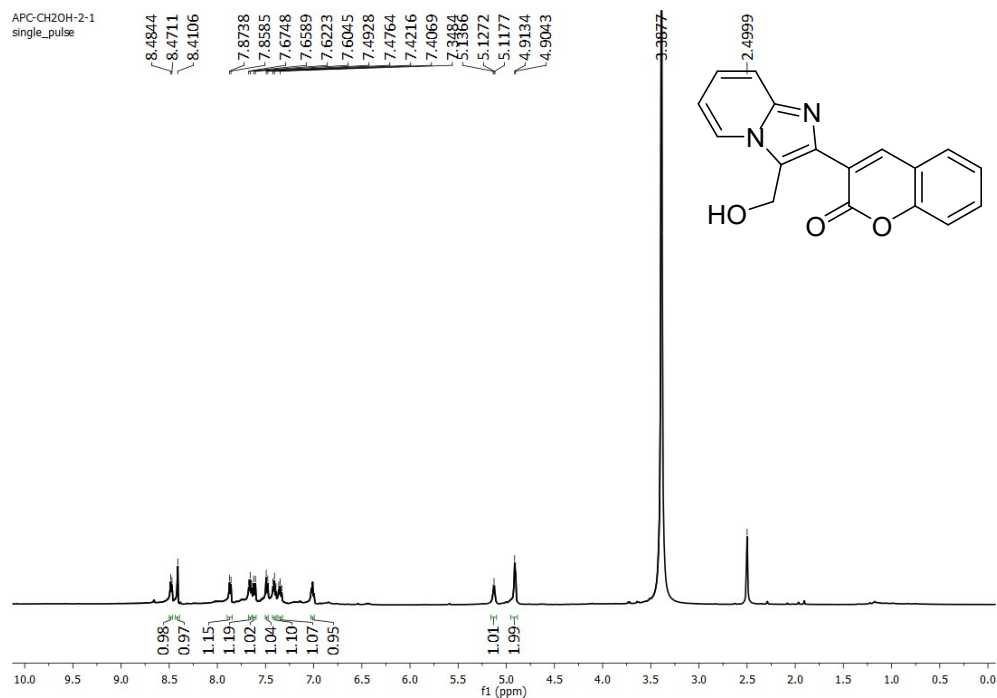

**Figure S4.**  $^1\text{H}$  NMR spectrum of **IMPC-OH** at 500 MHz in  $\text{DMSO-}d_6$

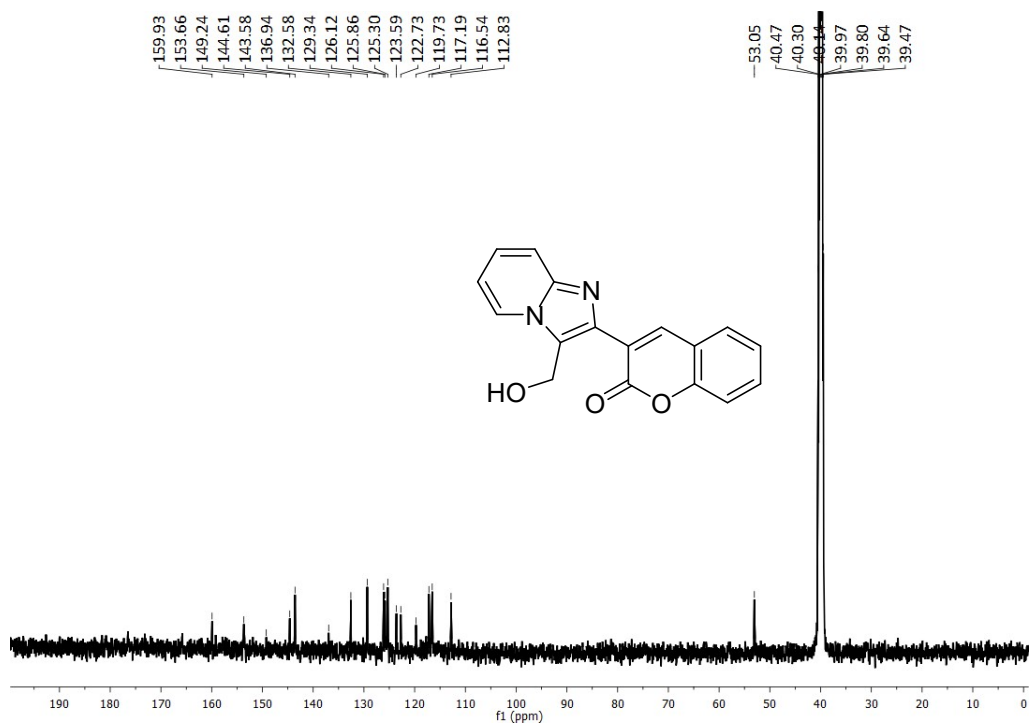

Figure S5. <sup>13</sup>C NMR spectrum of IMPC-OH at 125 MHz in DMSO-*d*<sub>6</sub>

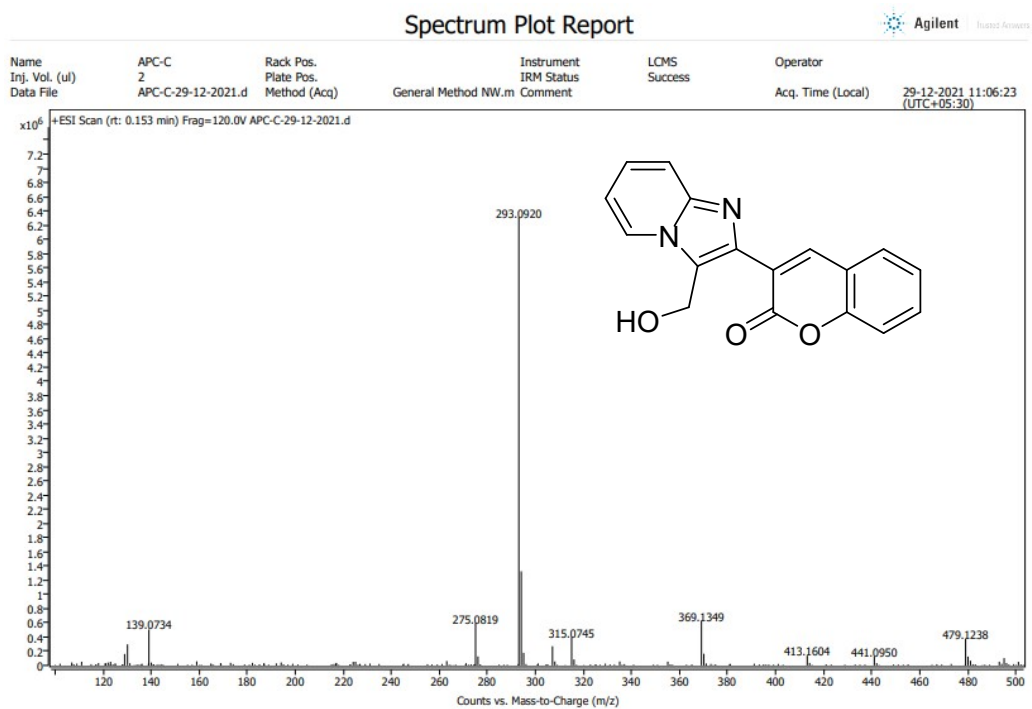

S6. HRMS Data of IMPC-OH

Figure

**Table S1.** Summary of previously reported fluorescent probes for the detection of OPs.

| Sr. No. | Analyte's detection | Sensor type                                     | Detection limit               | Detection state | Response type               | Recyclable | Test kit method | Reference                                     |
|---------|---------------------|-------------------------------------------------|-------------------------------|-----------------|-----------------------------|------------|-----------------|-----------------------------------------------|
| 1       | DCNP                | Imidazo[1,2-a]pyridine based probe              | IMPC<br>0.1 $\mu$ M           | Liquid          | Change in color             | Yes        | Yes             | Present Manuscript                            |
|         |                     |                                                 | IMPC-OH<br>0.13 $\mu$ M       |                 |                             |            |                 |                                               |
|         | DCP                 | Imidazo[1,2-a]pyridine based probe              | IMPC<br>1.58 nM               | Liquid          | Change in color             | Yes        | Yes             | Present Manuscript                            |
|         |                     |                                                 | IMPC-OH<br>0.62 nM            |                 |                             |            |                 |                                               |
| 2       | DCNP, DCP           | Triaryl methane dye                             | 2.1 mM - 3.2 mM               | Liquid          | Change in color (naked eye) | No         | No              | <i>Tetrahedron</i> 2012, 68, 8612-8616        |
| 4       | DCNP                | B-Sal-Oxime based                               | 92.2 $\mu$ M                  | Liquid          | -                           | No         | No              | <i>Chem. Commun.</i> , 2014, 50, 7531-7534.   |
| 5       | DCNP, DCP           | BODIPY                                          | 2.45 $\mu$ M and 2.21 $\mu$ M | Liquid          | Change in color             | No         | Yes             | <i>Org. Biomol. Chem.</i> 2014, 12, 8745–8751 |
| 6       | DCNP                | polymeric based probe                           | 1 mM                          | Liquid          | Naked eye                   | No         | Yes             | <i>Macromolecules.</i> , 2016, 7, 2568-2574.  |
| 7       | DCNP, DMMP, DCP     | Zn(II) bisterpyridine                           | 0.1 $\mu$ M                   | Liquid          | -                           | No         | Yes             | <i>Chem. Commun.</i> 2012, 48, 964–966        |
| 8       | DCNP, DCP           | Fluorescein-hydroxamate aldehyde based probe    | 3 mM                          | Liquid          | Change in color (naked eye) | No         | Yes             | <i>RSC Adv.</i> , 2014, 4, 24645-24648.       |
| 9       | DCNP                | N,N-dimethylaniline and pyridine containing dye | 0.9 mM                        | Liquid          | Change in color (naked eye) | No         | Yes             | <i>Chem. Eur. J.</i> 2011, 17, 6931 – 6934    |
| 10      | DCP                 | Rhodium(I,II) Paddlewheel                       | 0.113 $\mu$ M                 | Liquid          | Change in color (naked eye) | No         | No              | <i>Sens.</i> ,2024, 2325-2333.                |

|    |        |                                               |              |                        |                                               |    |                |                                                         |
|----|--------|-----------------------------------------------|--------------|------------------------|-----------------------------------------------|----|----------------|---------------------------------------------------------|
|    |        | el<br>Complexes                               |              |                        |                                               |    |                |                                                         |
| 11 | DCNP   | Pyrene<br>derived<br>polymeric<br>probe       | 0.1 mM       | Liquid                 | Turn-on<br>fluorescence                       | No | Yes            | <i>Macromolecules.</i> ,<br>2017, 17,<br>6888-6895.     |
| 12 | DCP    | rhodamine-<br>deoxylactam-<br>based<br>sensor | 9.66 nM      | Liquid<br>&<br>Gaseous | colorimetric<br>and<br>fluorimetric<br>sensor | No | Yes            | <i>Dyes and<br/>Pigments</i> ,<br>2019, 171,<br>107712. |
| 13 | # DCNP | Bis-indolyl<br>based<br>probes                | 10.8 $\mu$ M | Liquid                 | Change in<br>color (naked<br>eye)             | No | Yes            | <i>Analyst</i> ,<br>2018, 143,<br>528-535.              |
|    |        |                                               | <b>IMPC</b>  |                        |                                               |    | <b>IMPC-OH</b> |                                                         |

**Table S2** Solvent-dependent photophysical properties of **IMPC** and **IMPC-OH**



| Solvents        | 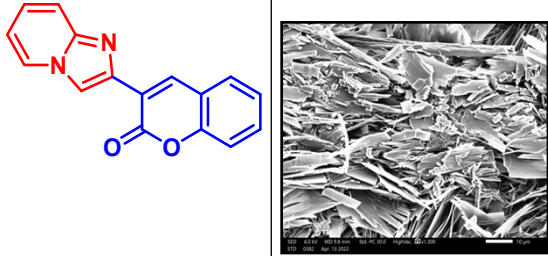 |                                                |                                                    |                                                                               |  |                                                |                                                    |                                                                               |
|-----------------|-----------------------------------------------------------------------------------|------------------------------------------------|----------------------------------------------------|-------------------------------------------------------------------------------|------------------------------------------------------------------------------------|------------------------------------------------|----------------------------------------------------|-------------------------------------------------------------------------------|
|                 | Absorbance<br>$\lambda_{\text{abs, max}}$<br>(nm)                                 | Emission<br>$\lambda_{\text{em, max}}$<br>(nm) | Stokes Shift<br>( $\Delta v$<br>$\text{cm}^{-1}$ ) | Molar Extension coefficient<br>( $\epsilon$ , $\text{M}^{-1}\text{cm}^{-1}$ ) | Absorbance<br>$\lambda_{\text{abs, max}}$<br>(nm)                                  | Emission<br>$\lambda_{\text{em, max}}$<br>(nm) | Stokes Shift<br>( $\Delta v$<br>$\text{cm}^{-1}$ ) | Molar Extension coefficient<br>( $\epsilon$ , $\text{M}^{-1}\text{cm}^{-1}$ ) |
| DMSO            | 358                                                                               | 514                                            | 8477                                               | 18000                                                                         | 349                                                                                | 535                                            | 9891                                               | 9900                                                                          |
| DMF             | 348                                                                               | 504                                            | 8894                                               | 21000                                                                         | 348                                                                                | 514                                            | 10013                                              | 9300                                                                          |
| $\text{CHCl}_3$ | 348                                                                               | 461                                            | 7043                                               | 22000                                                                         | 348                                                                                | 480                                            | 7902                                               | 11400                                                                         |
| ACN             | 346                                                                               | 495                                            | 8699                                               | 27000                                                                         | 347                                                                                | 525                                            | 9734                                               | 11500                                                                         |
| EtOH            | 355                                                                               | 498                                            | 8088                                               | 21000                                                                         | 336                                                                                | 446                                            | 4509                                               | 10900                                                                         |
| THF             | 357                                                                               | 486                                            | 6958                                               | 25000                                                                         | 341                                                                                | 402                                            | 9365                                               | 11700                                                                         |
| TOU             | 358                                                                               | 472                                            | 6746                                               | 20700                                                                         | 345                                                                                | 491                                            | 8281                                               | 11100                                                                         |
| Water           | 353                                                                               | 427                                            | 7538                                               | 13000                                                                         | 336                                                                                | 393                                            | -                                                  | 10000                                                                         |

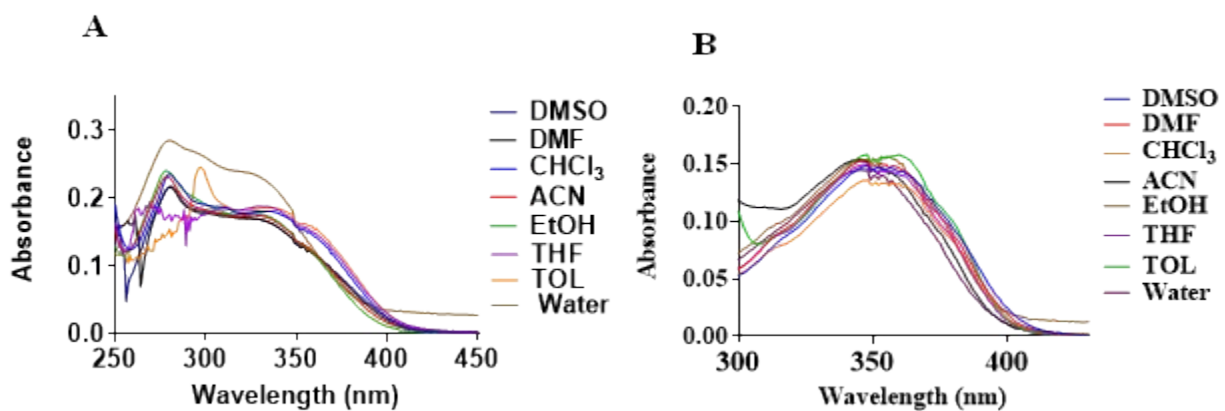

**Figure S7.** (A) UV-Vis. absorption of **IMPC** (20  $\mu\text{M}$ ) (B) UV-Vis. absorption of **IMPC-OH** (20  $\mu\text{M}$ )

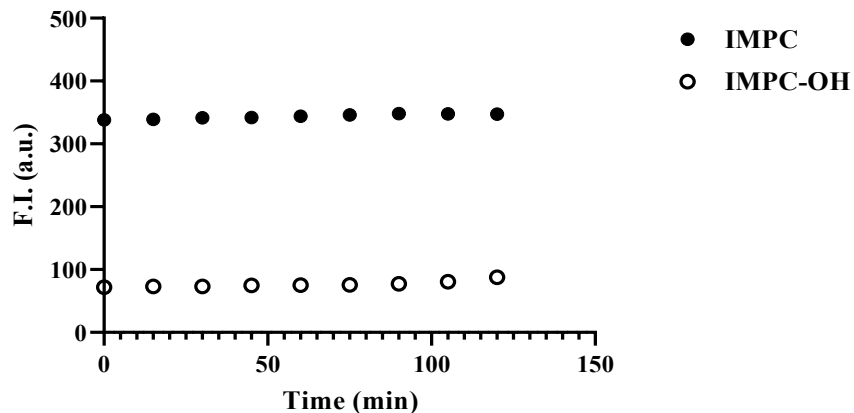

**Figure S8.** Photostability of (A) **IMPC** and (B) **IMPC-OH**

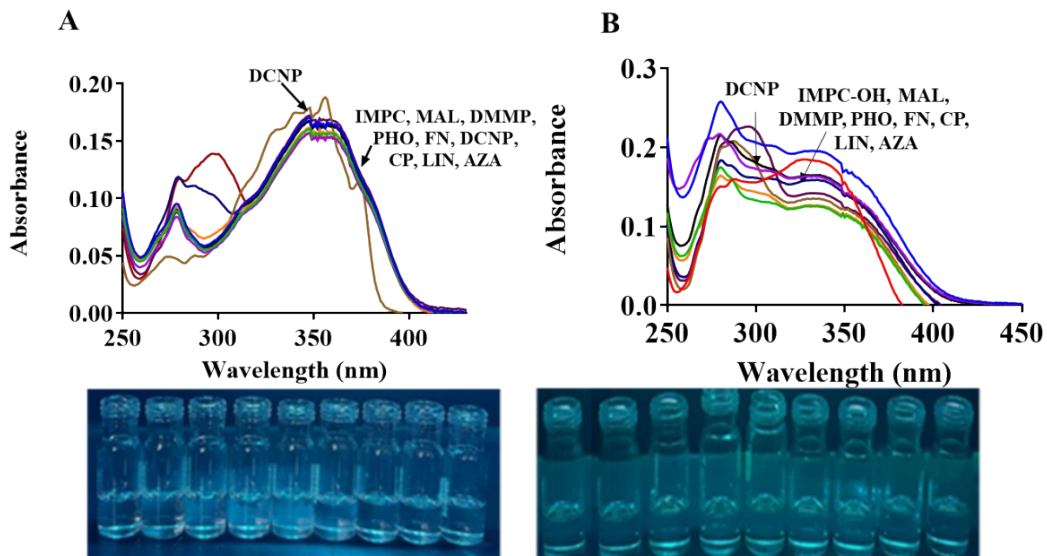

**Figure S9.** (A) UV-vis. Spectrum of **IMPC** (10  $\mu\text{M}$ ) ( $\lambda_{\text{ex}} = 348 \text{ nm}$ , exc. slit width = 5, em. slit width= 5 and 560 V) and (B) UV-Vis. of **IMPC-OH** (20  $\mu\text{M}$ ) ( $\lambda_{\text{ex}} = 348 \text{ nm}$ , exc. slit width = 10, em. slit width= 10 and 500 V) against various types of OPs compounds (10  $\mu\text{M}$ ) in  $\text{CHCl}_3$  and their visual changes under hand-held UV lamp at wavelength 254 nm for **IMPC**, MAL, DMMP, PHO, FN, DCNP, CP, LIN, AZA left hand side images and **IMPC-OH** followed by same sequence of OP compounds (right hand side images).

## Quantum Yield Measurements

To calculate the quantum yield, a single point method was used with quinine sulphate as a reference having quantum yield of 0.54 at 360 nm. The following equation was used to calculate the quantum yield:

$$\Phi_S = \Phi_R \times \left( \frac{I_S}{I_R} \right) \times \left( \frac{1 - 10^{-A_R}}{1 - 10^{-A_S}} \right) \times \left( \frac{\eta_S}{\eta_R} \right)^2$$

where,  $\Phi_S$  refers to quantum yield of sample,  $\Phi_R$  refers to quantum yield of reference,  $I_S$  &  $I_R$  being the measured integrated emission intensity (area under the curve),  $A_R$  &  $A_S$  refers to the absorbance of reference & sample,  $\eta_S$  and  $\eta_R$  is the refractive index for sample and reference. In order to minimize the re-absorption effects, absorbance intensity was kept below 0.1 at the excitation wavelength in the 10 mm fluorescence cuvette. An excitation and emission slit width of 5 nm at 600 V was used.

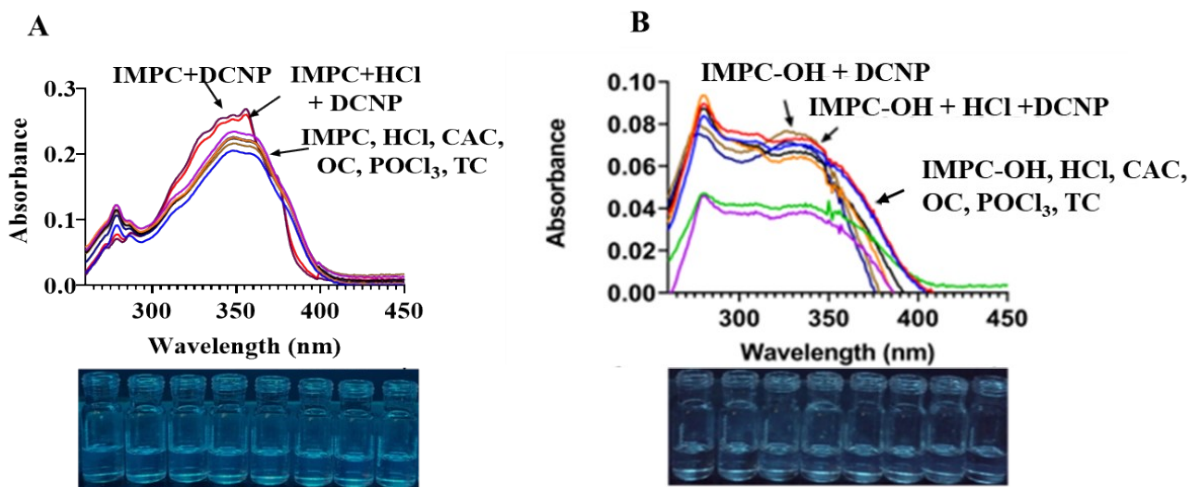

**Figure S10.** (A) UV spectra of **IMPC** (10  $\mu\text{M}$ ) (B) **IMPC-OH** (20  $\mu\text{M}$ ) with different interfering analytes ( $\lambda_{\text{ex}} = 348 \text{ nm}$ , exc. slit width = 10, em. slit width= 10 and 500 V) and their photographs under a UV lamp at 254 nm.

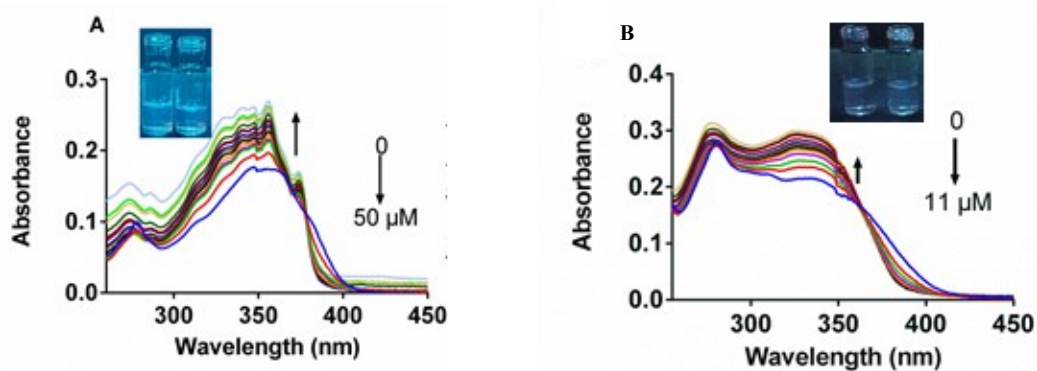

**Figure S11.** (A) UV-Vis. of **IMPC** (10  $\mu\text{M}$ ) (B) **IMPC-OH** with increasing concentration of DCNP Inset: Visible color image of **IMPC-OH** in absence and presence of DCNP under UV lamp at 254 nm.

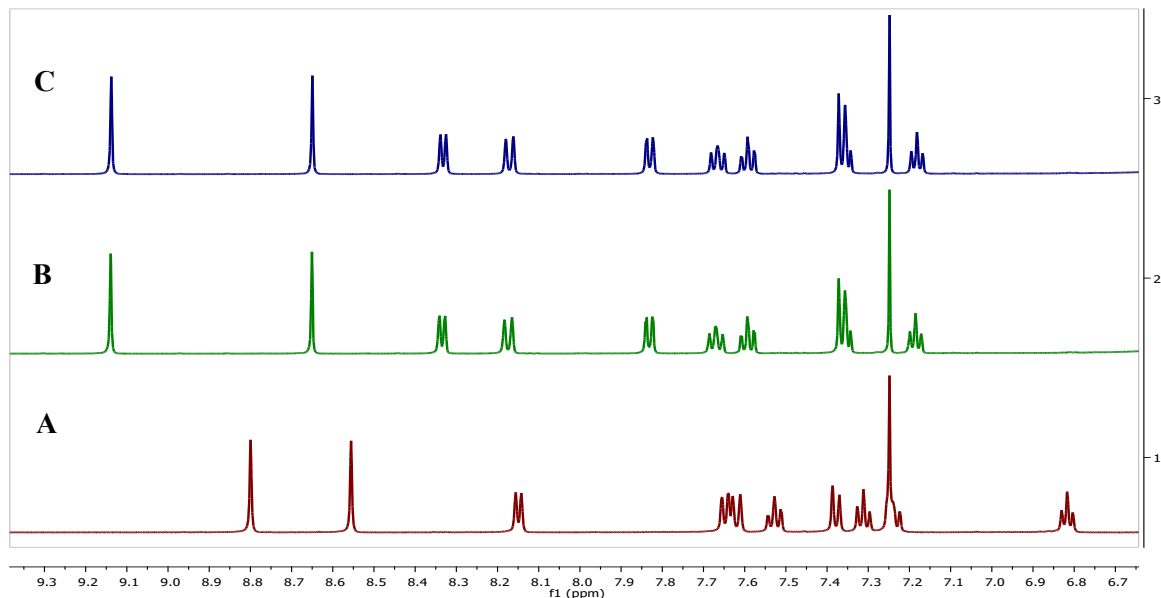

**Figure S12.** Partial  $^1\text{H}$  NMR of (A) **IMPC** (B) **IMPC** with DCNP just after addition (C) **IMPC** with DCNP after 1hr at 500 MHz in  $\text{CDCl}_3$ .

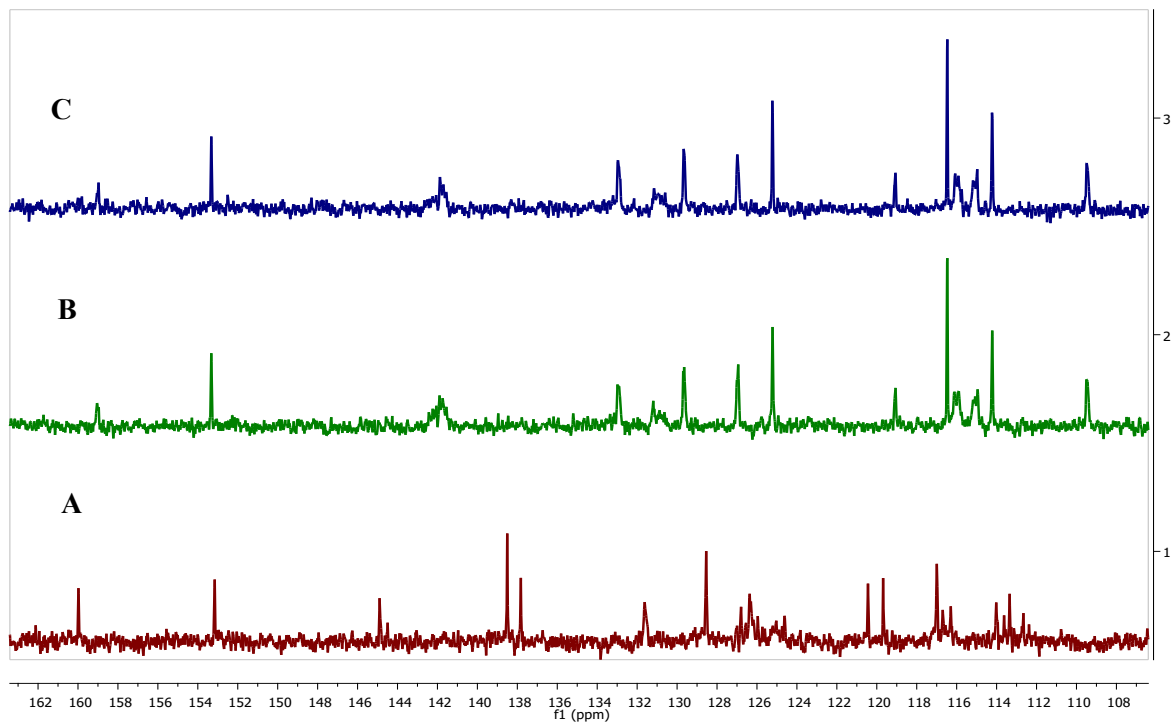

**Figure S13.**  $^{13}\text{C}$  NMR of (A) **IMPC** (B) **IMPC** with DCNP just after addition (C) **IMPC** with DCNP after 1hr.

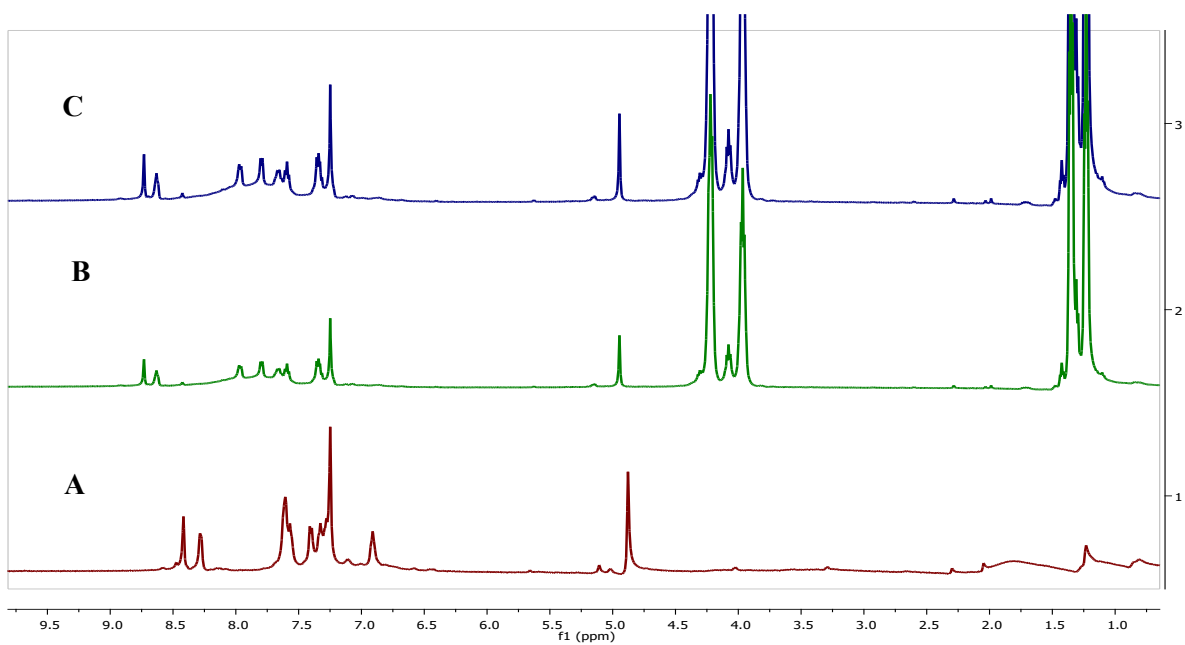

**Figure S14.** Partial  $^1\text{H}$  NMR of (A) **IMPC-OH** (B) **IMPC-OH** with DCNP just after addition (C) **IMPC-OH** with DCNP after 1hr at 500 MHz in  $\text{CDCl}_3$ .

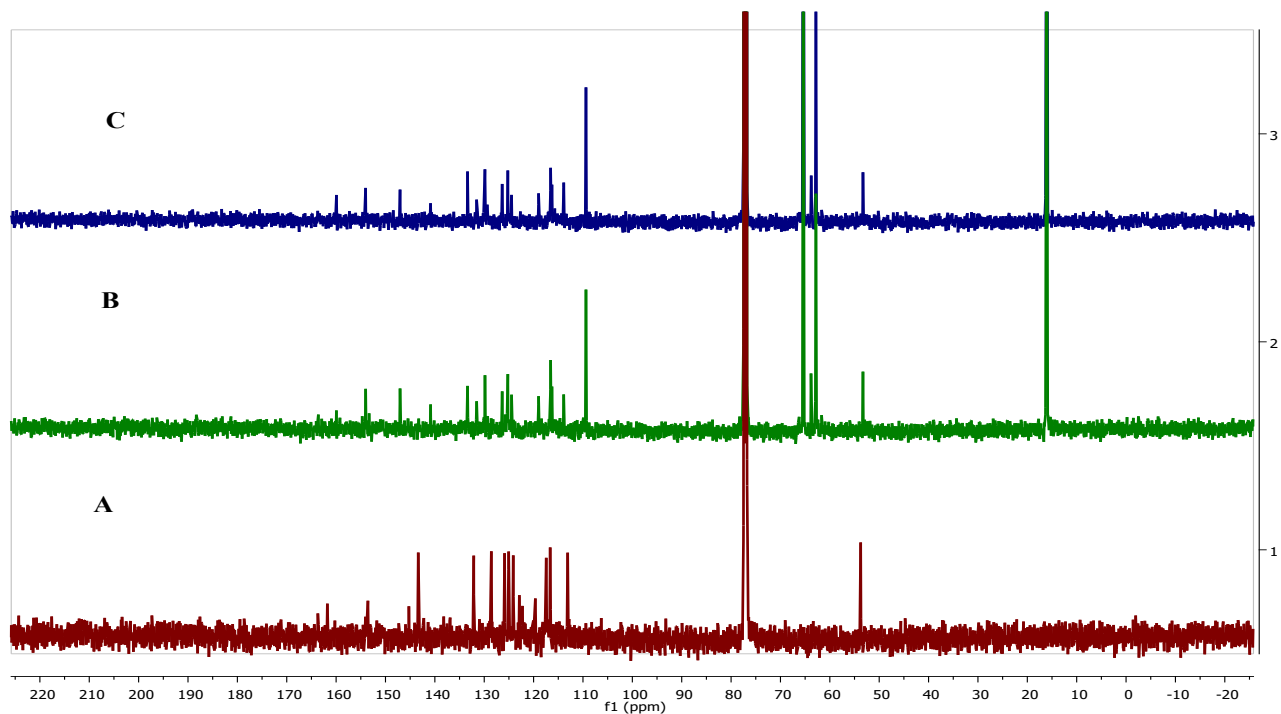

**Figure S15.** Partial  $^{13}\text{C}$  NMR of (A) **IMPC-OH** (B) **IMPC-OH + DCNP** (just after addition) (C) After 1 hr. at 125 MHz in  $\text{CDCl}_3$ .

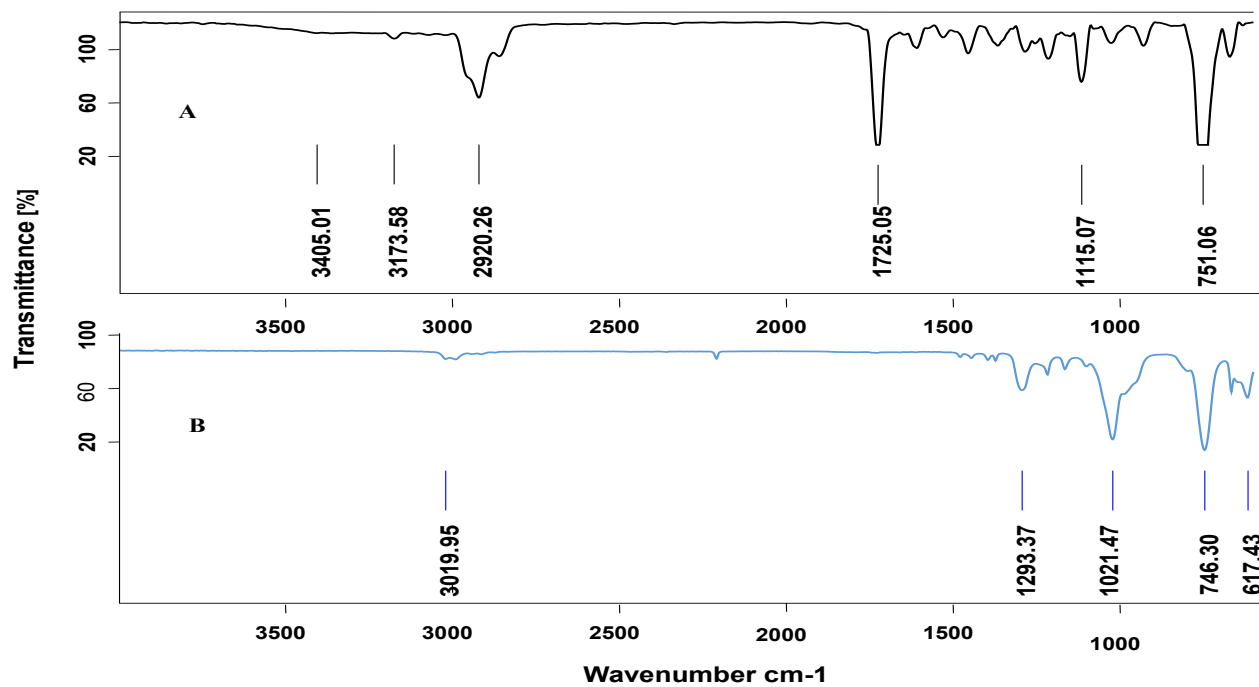

**Figure S16.** IR spectrum of (A) **IMPC** alone and (B) **IMPC** with DCNP.

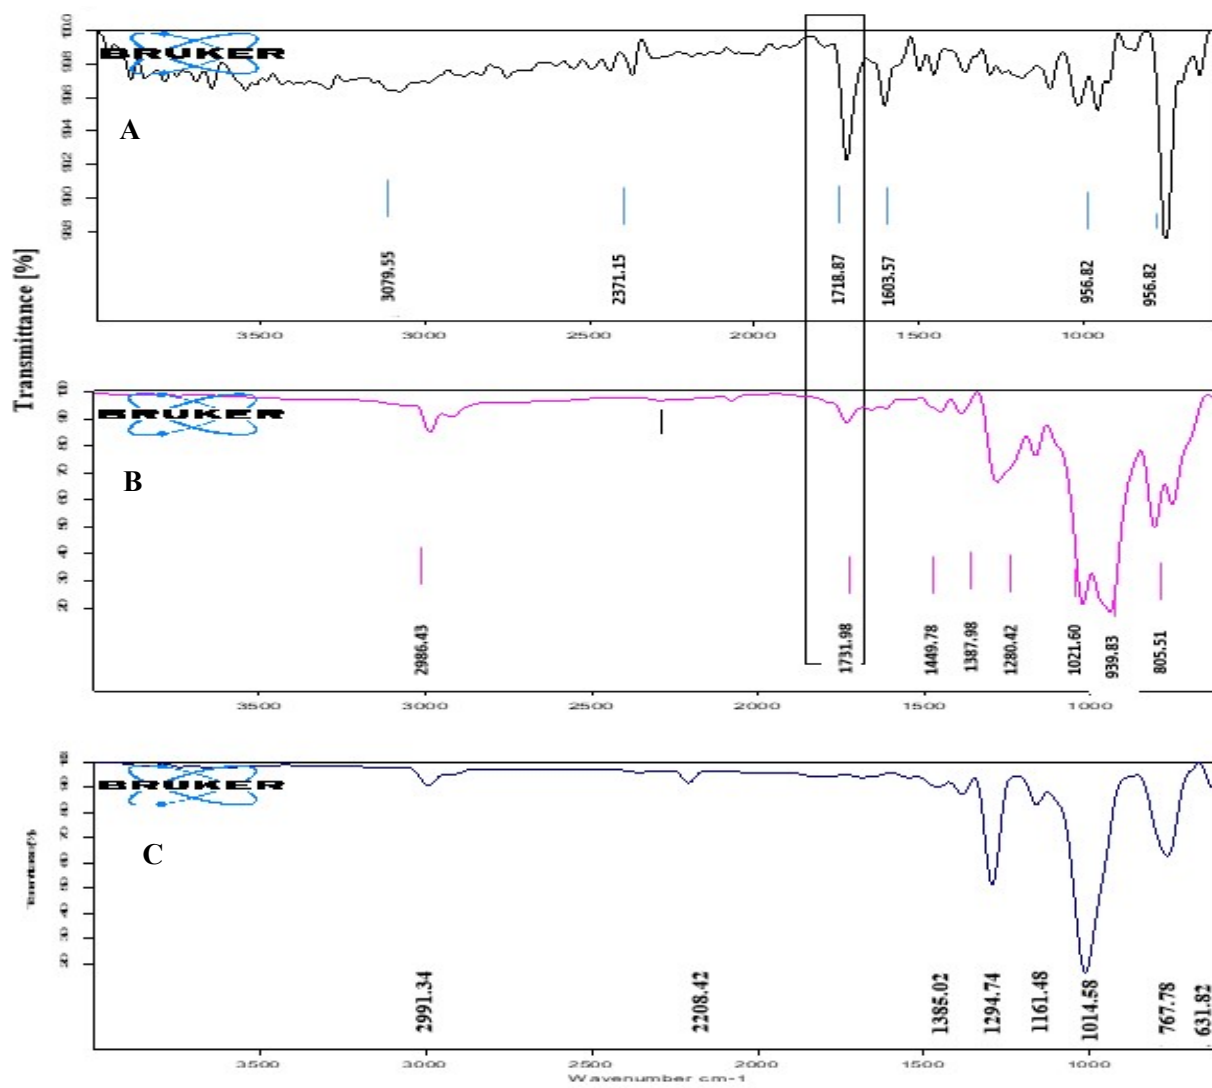

**Figure S17.** IR spectrum of (A) IMPC-OH alone and (B) IMPC-OH with DCNP (C) DCNP only.

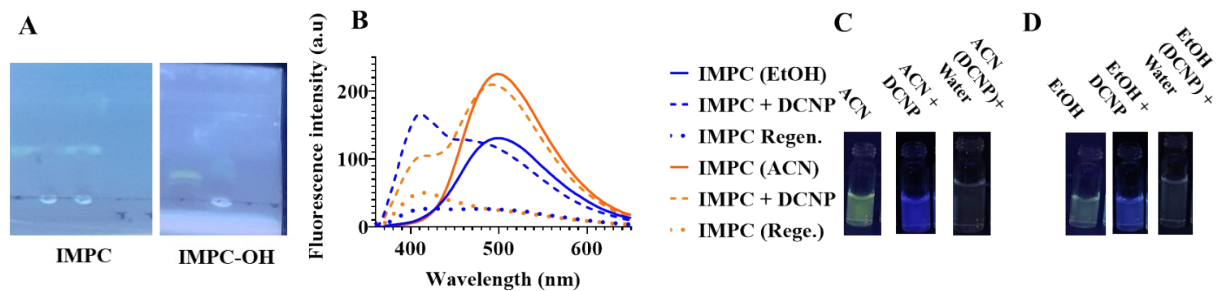

**Figure S18.** (A) TLC analysis of **IMPC** (left) and **IMPC-OH** (right) where probe only, probe with DCNP followed by Co are spotted from left to right (B) Fluorecence spectrum of **IMPC** in solvent EtOH and ACN, after addition of DCNP and upon dilution with water (C) Visualization of the EtOH systems (D) Visualization of the ACN systems at 365 nm.

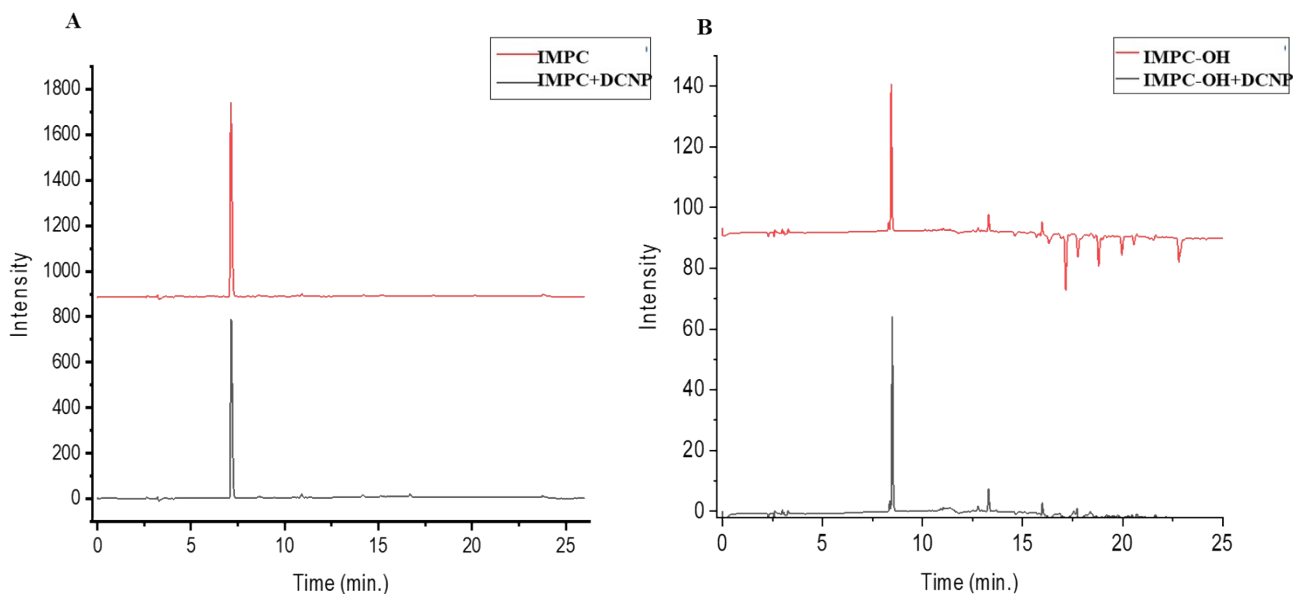

**Figure S19.** HPLC data of (A) **IMPC** and **IMPC** with DCNP, (B) **IMPC-OH** and **IMPC-OH** with DCNP HPLC Analysis.

High-performance liquid chromatography (HPLC) analysis was performed to prove the regeneration mechanism of both probes, which was executed on Agilent HPLC with a Eclipse Plus C18 reverse-phase column (4.6 mm x 250 mm, 5  $\mu$ M, S.No.USUXA31525) at room temperature.

| Time (min.) | A (0.1% Formic acid in water) | B (Acetonitrile) |
|-------------|-------------------------------|------------------|
| 2.00        | 90                            | 10               |
| 20.00       | 10                            | 90               |
| 20.50       | 10                            | 90               |
| 23.90       | 10                            | 90               |
| 24.00       | 90                            | 10               |
| 27.00       | 90                            | 10               |

Mobile phase: A (Formic acid in water (0.1%)): B (ACN)



Flow rate: 1 mL/min

Detector: UV/Vis. detector.

Data acquired were processed using Open Lab CDS Chemstation Analysis data system.
